# Supplementary material for: E-mobility in agriculture: differences in perception between experienced and non-experienced electric vehicle users
Source: Springer Nature journal article supplement (doi:10.1007/s10098-018-1615-2), 2018-10-06
Supplement: MOESM1 [file 16180622]

## Supplementary Information: Questionnaire

This file is supplementary information to the following publication:

Riedner L, Mair C, Zimek M, Bruderermann T and Stern T (2018). E-Mobility in agriculture: Differences in perception among experienced and non-experienced electrical vehicle users. *Clean Technologies and Environmental Policy*.

1. Which type of farm do you operate (multiple answers possible)?
  - livestock farm (pig/cattle/sheep/horse/poultry holding)
  - wineries and fruit growers
  - arable farm
  - others
  
2. Please tick the appropriate box. Our farm has/does... (multiple answers possible)
  - farm-gate sale (e.g. wine tavern etc.)
  - Provision of accommodation (e.g. "farm holidays", holiday rooms, holiday apartments etc.)
  - none of the options mentioned
  
3. Do you run an organic or conventional farm?
  - organic farming
  - conventional farming
  
4. Do you own a (purely battery-powered) e-vehicle or have you already had experience with e-vehicles?
  - Yes, I own one
  - Yes, I have experience with electric vehicles
  - No, both do not apply
  
5. To what extent would you use electric cars (cars only) for business and private purposes in relation to the number of journeys? (slider to indicate share)
  
6. What are the three most important attributes considering the use of an electric car (select three)?
  - Range
  - Energy consumption
  - Battery recharge time
  - Private charging station
  - Environmental friendliness
  - Image support
  - Public charging stations
  - Driving performance when loaded
  - Hilly area driving performance
  - Transportation capability of people
  - Transportation capability of goods
  - Self-sufficient power
  
7. How important are the following features in connection with the use of an electric car to you?  
(5step Likert scale, non-answer possible)
  - Range
  - Energy consumption
  - Battery recharge time
  - Private charging station
  - Environmental friendliness
  - Image support
  - Public charging stations
  - Driving performance when loaded
  - Hilly area driving performance
  - Transportation capability of people
  - Transportation capability of goods
  - Self-sufficient power

8. How do you rate the following features in connection with the use of an electric car?

(5step Likert scale, non-answer possible)

- Range
- Energy consumption
- Battery recharge time
- Private charging station
- Environmental friendliness
- Image support
- Public charging stations
- Driving performance when loaded
- Hilly area driving performance
- Transportation capability of people
- Transportation capability of goods
- Self-sufficient power

9. How well are you informed about e-commercial vehicles? (5step Likert scale)

**Two electric vehicles for agriculture (agricultural EV) are illustrated below.**

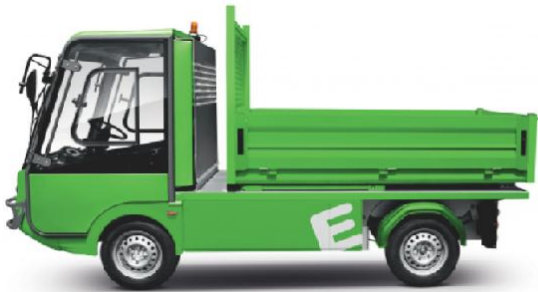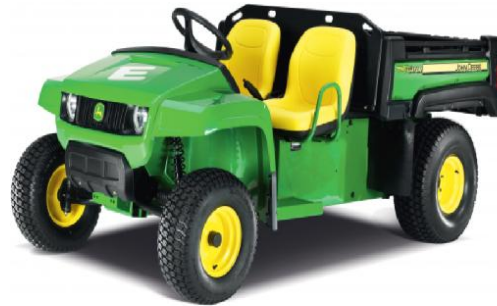

10. You have now seen agricultural EV. How well do the following characteristics apply to you in connection with the use of an agricultural EV?

(5step Likert scale, non-answer possible)

- Range
- Energy consumption
- Battery recharge time
- Private charging station
- Environmental friendliness
- Image support
- Public charging stations
- Driving performance when loaded
- Hilly area driving performance
- Transportation capability of people
- Transportation capability of goods
- Self-sufficient power

11. You have now seen agricultural EV. What are the three most important attributes considering the use of an agricultural EV? (select three)

- Range
- Energy consumption
- Battery recharge time
- Private charging station
- Environmental friendliness
- Image support
- Public charging stations
- Driving performance when loaded
- Hilly area driving performance
- Transportation capability of people
- Transportation capability of goods
- Self-sufficient power

12. You saw agricultural EV earlier. How important are the following features for you in connection with the use of an agricultural EV? (5step Likert scale, non-answer possible)

- Range
- Energy consumption
- Battery recharge time
- Private charging station
- Environmental friendliness
- Image support
- Public charging stations
- Driving performance when loaded
- Hilly area driving performance
- Transportation capability of people
- Transportation capability of goods
- Self-sufficient power

13. Could such agricultural EV (as shown above) be useful for your business? (5step Likert scale)
14. Gender (m/f)
15. How old are you? (numeric)
16. Highest completed education.
  - No compulsory school leaving certificate
  - Compulsory school leaving certificate
  - Apprenticeship with final apprenticeship examination
  - Vocational school without higher school certificate
  - High School with higher school certificate
  - University, University of applied science, College
  - Other\_\_\_\_\_
17. How many cars are on your farm? (numeric)
18. How many car license holders are in your company? (numeric)
19. Please tick the appropriate box. Our farm owns ...
  - a battery memory
  - a photovoltaic system (continue to question 26)
  - a wind power plant or hydroelectric power plant
  - another power source
  - None of the options mentioned
20. Please tick the appropriate box. The generation of electricity by photovoltaics takes place for the...
  - Green electricity feed-in
  - Use of own electricity
21. What is your attitude towards new technologies in general? (5step Likert scale)
22. Do you intend to become active in the following areas over the next two years?  
(multiple answers possible)
  - Electric mobility
  - Saving energy and energy efficiency
  - Photovoltaics
  - Battery memory
  - Electricity supply to wood
  - Wind and water power
  - No activities planned.
  - Other
23. The goal of running an energy self-sufficient farm is for me...
  - very important
  - important
  - unimportant
  - very unimportant
